# Supplementary material for: Comparison between cultured and wild Pacific white shrimp (Penaeus vannamei) vitellogenesis: next-generation sequencing and relative expression of genes directly and indirectly related to reproduction
Source: PeerJ. 2021 Feb 23;9:e10694. doi: 10.7717/peerj.10694 (PMC7908874; doi:10.7717/peerj.10694)
Supplement: Supplemental Information 1 [file peerj-09-10694-s001.xlsx]

## Sheet: Primers list
Gene	Sequence	Alignment temperature °C
Vtg	GGAGGCCAGTCAGGATTC	56
	GCGAGGGCTTTCAAAGAG
ProR	GCAGATGGATTCTGTCAGGG	54
	TCCGTCTTCGCTTTGGTG
ODP	GATGAGGGGTCTCGCAG	53.5
	GGGACGGTCATCATCTCTC
FaMet	CGAGATCTTCATCGGCTGC	54
	CATCCACTCTCCAGAGGC
CrusA1	CTCGCTCTCGTTGCAGTG	52
	GATGTTCATGAAGGCGGC
CrusC1	CGACATCGAGAGCGTTCC	52
	CTCCAACCTGACAGTCCC
L8	GTAGGCAATGTCATCCCC	58
	CGTGTAAAGCTCCCTTCA
β-actin	TGTGACGACGAAGTAGCC	53
	GTCACGAACGATTTCTCGC
