# Supplementary material for: Comparison between cultured and wild Pacific white shrimp (Penaeus vannamei) vitellogenesis: next-generation sequencing and relative expression of genes directly and indirectly related to reproduction
Source: PeerJ. 2021 Feb 23;9:e10694. doi: 10.7717/peerj.10694 (PMC7908874; doi:10.7717/peerj.10694)
Supplement: Supplemental Information 3 — Directly related genes. Indirectly related genes. Accession numbers of reported genes. [file peerj-09-10694-s003.xlsx]

## Sheet: Directly related genes
	Directly related genes
Protein	Function	Source (First identified in Unirpot.org and then corroborated with other sources)
Estradiol 17 beta deshydrogenase	Involved in estradiol biosynthesis	Thongbuakaew T, Siangcham T, Suwansa-Ard S, Elizur A, Cummins SF, Sobhon P, Sretarugsa P. 2016. Steroids and genes related to steroid biosynthesis in the female giant freshwater prawn, Macrobrachium rosenbergii. Steroids, 107:149-160.
Estrogen Sulfotransferase	Involved in estrogen biosynthesis. Shows widespread expression within many tissues, and at relatively high levels in the central nervous system during ovarian maturation.	Thongbuakaew T, Siangcham T, Suwansa-Ard S, Elizur A, Cummins SF, Sobhon P, Sretarugsa P. 2016. Steroids and genes related to steroid biosynthesis in the female giant freshwater prawn, Macrobrachium rosenbergii. Steroids, 107:149-160.
Extra sex comb	Histone methylation	Uniprot.org
Fem-1	Sex-determining protein	Spence AM, Coulson A, Hodgkin J. 1990. The product of fem-1, a nematode sex-determining gene, contains a motif found in cell cycle control proteins and receptors for cell-cell interactions. Cell, 60(6):981-990.
Gustavus	Required maternally in the germ line for efficient primordial germ cell formation.	Uniprot.org
Hydroxysteroid dehydrogenase	Involved in progesterone biosynthesis	Thongbuakaew T, Siangcham T, Suwansa-Ard S, Elizur A, Cummins SF, Sobhon P, Sretarugsa P. 2016. Steroids and genes related to steroid biosynthesis in the female giant freshwater prawn, Macrobrachium rosenbergii. Steroids, 107:149-160.
Krueppel	It is involved in the segmentation of the embryo	Miyakawa H, Watanabe M, Araki M, Ogino Y, Miyagawa S, Iguchi T. 2018. Juvenile hormone-independent function of Krüppel homolog 1 in early development of water flea Daphnia pulex. Insect biochemistry and molecular biology. 93:12-18.
Mago Nashi	A protein complex consisting of Mago Nashi and Tsunagi/Y14 is required to establish the major body axes and for the localization of primordial germ cell determinants during Drosophila melanogaster oogenesis	Parma DH, Bennett PE, Boswell RE. 2007. Mago Nashi and Tsunagi/Y14, respectively, regulate Drosophila germline stem cell differentiation and oocyte specification. Developmental biology, 308(2):507-519.
Maternal effect embryo arrest	Embryo development ending	Cho EJ, Yuen CY, Kang BH, Ondzighi CA, Staehelin LA, Christopher DA. 2011. Protein disulfide isomerase-2 of Arabidopsis mediates protein folding and localizes to both the secretory pathway and nucleus, where it interacts with maternal effect embryo arrest factor. Molecules and cells. 32(5):459-475.
Maternal Embryonic Leucine zipper Kinase	Serine/threonine-protein kinase involved in various processes such as cell cycle regulation	Uniprot.org
Maternal protein tudor	Required during oogenesis for the formation of primordial germ cells and for normal abdominal segmentation.	Golumbeski GS, Bardsley A, Tax F, Boswell RE. 1991. Tudor, a posterior-group gene of Drosophila melanogaster, encodes a novel protein and an mRNA localized during mid-oogenesis. Genes & Development. 5(11):2060-2070.
Masquerade	In embryogenesis, has a role in somatic muscle attachment and in the development of axonal pathways probably by stabilizing cell-matrix adhesion and/or by acting as a competitive antagonist of serine proteases
Meiosis regulator	Essential regulator of oogenesis required for female meiotic progression to repress transposable elements and preventing their mobilization, which is essential for the germline integrity.	Uniprot.org
Membrane progestin receptor	Plasma membrane progesterone (P4) receptor coupled to G proteins	Preechaphol R, Klinbunga S, Yamano K, Menasveta P. 2010. Molecular cloning and expression of progestin membrane receptor component 1 (Pgmrc1) of the giant tiger shrimp Penaeus monodon. General and Comparative Endocrinology. 168:440-449.
Missing oocyte meiosis	Cellular response to amino acid starvation Source. Positive regulation of TOR signaling	Uniprot.org
Notch	Regulates oogenesis, the differentiation of the ectoderm and the development of the central and peripheral nervous system, eye, wing disk, muscles and segmental appendages such as antennae and legs, through lateral inhibition or induction	Goutte C, Hepler W, Mickey KM, Priess JR. 2000. aph-2 encodes a novel extracellular protein required for GLP-1-mediated signaling. Development, 127(11), 2481-2492.
Ovarian development protein	Directly involved in ovary development.	This work; Uniprot.org
Ovaric peritrophin	Chitin metabolic process	Uniprot.org
Partitioning defective	Necessary for apicobasal and anterior-posterior asymmetries associated with cell adhesion and gastrulation during the first few cell cycles of embryogenesis	Hung TJ, Kemphues KJ. 1999. PAR-6 is a conserved PDZ domain-containing protein that colocalizes with PAR-3 in Caenorhabditis elegans embryos. Development, 126(1):127-135.
Progesterone receptor	The effects of progesterone can be mediated by genomic and nongenomic actions, and nuclear and membrane progesterone receptors are involved in female reproductive events. Depending on the isoform, progesterone receptor functions as transcriptional activator or repressor	Ye H, Song P, Ma J, Huang H, Wang G. 2010. Changes in progesterone levels and distribution of progesterone receptor during vitellogenesis in the female mud crab (Scylla paramamosain), Marine and Freshwater Behaviour and Physiology. 43(1):25-35; Wu X, Chen H, Liu Z, Cheng Y. 2014. Immunorecognition and distribution of progesterone receptors in the Chinese mitten crab Eriocheir sinensis during ovar…
Sex-lethal homolog	Function on sex determination, dosage compensation, and oogenesis	Zhang YP, Qiao H, Zhang WY, Sun SM, Jiang SF, Gong YS, Xiong YW, Jin SB, Fu HT. 2013. Molecular cloning and expression analysis of two sex-lethal homolog genes during development in the oriental river prawn, Macrobrachium nipponense. Genet Mol Res. 12(4):4698-711.
Slowmo	Required to regulate peristaltic movement and also for germline proliferation in males and females	Carhan A, Reeve S, Dee CT, Baines RA, Moffat KG. 2004. Mutation in slowmo causes defects in Drosophila larval locomotor behaviour. Invertebrate Neuroscience, 5(2), 65-75.
Strawberry notch	Required during many developmental stages including oogenesis, embryogenesis and imaginal development of the eye, wing and leg.	Majumdar A, Nagaraj R, Banerjee U. 1997. Strawberry notch encodes a conserved nuclear protein that functions downstream of Notch and regulates gene expression along the developing wing margin of Drosophila. Genes & development, 11(10):1341-1353.
TsunagiY14	A protein complex consisting of Mago Nashi and Tsunagi/Y14 is required to establish the major body axes and for the localization of primordial germ cell determinants during Drosophila melanogaster oogenesis	Parma DH, Bennett PE, Boswell RE. 2007. Mago Nashi and Tsunagi/Y14, respectively, regulate Drosophila germline stem cell differentiation and oocyte specification. Developmental biology, 308(2):507-519.
Vasa	Involved in translational control mechanisms operating in early stages of oogenesis. Required maternally in many stages of oogenesis, including cystocyte differentiation, oocyte differentiation, and specification of anterior-posterior polarity in the developing cysts.	Lasko PF, Ashburner M. 1988. The product of the Drosophila gene vasa is very similar to eukaryotic initiation factor-4A. Nature, 335(6191):611-617.
Vtg	Main source of nutrients for developing larvae	Jimenez-Gutierrez et al, 2019
Vitelline envelope receptor of lysin	Receptor for sperm lysin, which creates a hole in the egg vitelline envelope through which the sperm passes to reach the egg cell membrane.	Swanson WJ, Vacquier VD. 1997. The abalone egg vitelline envelope receptor for sperm lysin is a giant multivalent molecule. Proceedings of the National Academy of Sciences, 94(13):6724-6729.
Vitelline envelope zona pellucida	Prominent components of egg coats.	Aagaard JE, Yi X, MacCoss MJ, Swanson WJ. 2006. Rapidly evolving zona pellucida domain proteins are a major component of the vitelline envelope of abalone eggs. Proceedings of the National Academy of Sciences, 103(46):17302-17307.
Vitelline Membrane Outer layer	Component of the outer membrane of the vitelline layer of the egg	Uyeda A, Inuzuka C, Doi Y, Kido S, Kikuchi M. 1994. Cloning and sequencing of hen magnum cDNAs encoding vitelline membrane outer layer protein I (VMO-I). Gene, 144(2):311-312.
VtgR	Vitellogenin receptor	Jimenez-Gutierrez et al, 2019

## Sheet: Indirectly related genes
	Indirectly related genes
Protein	Function	Source (First identified in Unirpot.org and then corroborated with other sources)
Adam	Acts as an activator of Notch pathway by mediating cleavage of Notch	Goutte C, Hepler W, Mickey KM, Priess JR. 2000. aph-2 encodes a novel extracellular protein required for GLP-1-mediated signaling. Development, 127(11), 2481-2492.
Agrin	Plays a central role in the formation and the maintenance of the neuromuscular junction (NMJ) and directs key events in postsynaptic differentiation. Founded in embryos neveous system	Rupp F, Payan DG, Magill-Solc C, Cowan DM, Scheller RH. 1991. Structure and expression of a rat agrin. Neuron, 6(5):811-823.
Asterix	Expressed in the early neural plate of embryos.	Pinho S, Simonsson PR, Trevers KE, Stower MJ, Sherlock WT, Khan M, Streit A, Sheng G, Stern CD. 2011. Distinct steps of neural induction revealed by Asterix, Obelix and TrkC, genes induced by different signals from the organizer. PloS one, 6(4). e19157.
Blastula protease	Could be involved in the differentiation of ectodermal lineages and subsequent patterning of the embryo.	Lepage T, Ghiglione C, Gache N. 1992. Spatial and temporal expression pattern during sea urchin embryogenesis of a gene coding for a protease homologous to the human protein BMP-1 and to the product of the Drosophila dorsal-ventral patterning gene tolloid. Development, 114(1):147-163.
Bcl-2-related ovarian killer	A seven domain Kazal serine proteinase inhibitor	Scott MJ, Huckaby CS, Kato I, Kohr WJ, Laskowski M, Tsai MJ, O'Malley BW. 1987. Ovoinhibitor introns specify functional domains as in the related and linked ovomucoid gene. Journal of Biological Chemistry, 262(12):5899-5907.
Chitinase	Random endo-hydrolysis of N-acetyl-beta-D-glucosaminide (1->4)-beta-linkages in chitin and chitodextrins	Uniprot.org
Cyclin B	cyclin-dependent protein serine/threonine kinase activator activity	Pines J, Hunter T. 1989. Isolation of a human cyclin cDNA: evidence for cyclin mRNA and protein regulation in the cell cycle and for interaction with p34cdc2. Cell, 58(5):833-846.
Clathrin heavy chain	May play a role in yolk protein clatherin-mediated endocytosis by oocytes during oogenesis	Bazinet C, Katzen AL, Morgan M, Mahowald AP, Lemmon SK. 1993. The Drosophila clathrin heavy chain gene: clathrin function is essential in a multicellular organism. Genetics, 134(4), 1119-1134.
Clathrin light chain	Clathrin is the major protein of the polyhedral coat of coated pits and vesicles.	Jackson AP, Parham P. 1988. Structure of human clathrin light chains. Conservation of light chain polymorphism in three mammalian species. Journal of Biological Chemistry, 263(32):16688-16695.
Crustacyanin A1	Producing shell colour and patterns and could be implicated in other physiological process such as reproduction	This work; Ma H, Sun J, Xu W, Gao W, Hu G, Lai X, Yan B, Gao H. 2020. Cloning and functional study of lipocalin: retinol‑binding protein‑like gene family of the ridgetail white prawn, Exopalaemon carinicauda. Molecular Genetics and Genomics. 295(2):453-464.
Crustacyanin C1	Producing shell colour and patterns and could be implicated in other physiological process such as reproduction	This work; Ma H, Sun J, Xu W, Gao W, Hu G, Lai X, Yan B, Gao H. 2020. Cloning and functional study of lipocalin: retinol‑binding protein‑like gene family of the ridgetail white prawn, Exopalaemon carinicauda. Molecular Genetics and Genomics. 295(2):453-464.
Cytochrome P450	Hydroxylates all trans-retinoic acid (atRA) to 4-hydroxyretinoate and may play a role in atRA clearance during fetal development. Besides, several cytochrome P450 dependent steps could be involved in steroids synthesis, such as ecdysone, progesterone and testosterone.	James MO, Boyle SM. 1998. Cytochromes P450 in crustacea. Comparative Biochemistry and Physiology Part C: Pharmacology, Toxicology and Endocrinology. 121(1-3):157-172.; Thongbuakaew T, Siangcham T, Suwansa-Ard S, Elizur A, Cummins SF, Sobhon P, Sretarugsa P. 2016. Steroids and genes related to steroid biosynthesis in the female giant freshwater prawn, Macrobrachium rosenbergii. Steroids, 107:149-1…
Diuretic hormone	Neuropeptide hormone activity. Positive regulation of circadian sleep/wake cycle, wakefulness.	Uniprot.org
FAMeT	The crustacean´s homolog to the insect juvenile hormone and is believed to regulate growth and reproduction in crustaceans	Hui JHL, Tobe SS, Chan SM. 2008. Characterization of the putative farnesoic acid O-methyltransferase (LvFAMeT) cDNA from white shrimp, Litopenaeus vannamei: Evidence for its role in molting. Peptides, 29(2), 252-260.
Female Sterile Homeotic	Required maternally for proper expression of other homeotic genes involved in pattern formation	Haynes SR, Mozer BA, Bhatia-Dey N, Dawid IB. 1989. The Drosophila fsh locus, a maternal effect homeotic gene, encodes apparent membrane proteins. Developmental biology. 134(1). 246-257.
G2mitoticCB3	Essential for the control of the cell cycle at the G2/M (mitosis) transition	Pines J, Hunter T. 1989. Isolation of a human cyclin cDNA: evidence for cyclin mRNA and protein regulation in the cell cycle and for interaction with p34cdc2. Cell, 58(5):833-846.
Gastrula zinc finger	May be involved in transcriptional regulation	Nietfeld, W., El-Baradi, T., Mentzel, H., Pieler, T., Köster, M., Pöting, A., & Knöchel, W. (1989). Second-order repeats in Xenopus laevis finger proteins. Journal of molecular biology, 208(4), 639-659.
Gonadotropin-releasing hormone II receptor	Involved in signaling and progesterone-mediated oocyte maturation	Uengwetwanit T, Ponza P, Sangsrakru D, Wichadakul D, Ingsriswang S, Leelatanawit R, Klinbunga S, Tangphatsornruang S, Karoonuthaisiri N. 2018. Transcriptome-based discovery of pathways and genes related to reproduction of the black tiger shrimp (Penaeus monodon). Mar Genomics. 37:69-73.
Homeobox	Expression factors, which developing are widely expressed in many organs of vertebrate embryos	Alappat S, Zhang ZY, Chen YP. 2003. Msx homeobox gene family and craniofacial development. Cell research, 13(6):429-442.
Hsp70	Promoted the maturation and functional cell surface expression of ENaC in Xenopus oocytes	Kabani M, Martineau CN. 2008. Multiple hsp70 isoforms in the eukaryotic cytosol: mere redundancy or functional specificity?. Current genomics, 9(5):338-348.
Inactive hydroxyesteroid dehydrogenase	Involved in progesterone biosynthesis	Uniprot.org; Thongbuakaew T, Siangcham T, Suwansa-Ard S, Elizur A, Cummins SF, Sobhon P, Sretarugsa P. 2016. Steroids and genes related to steroid biosynthesis in the female giant freshwater prawn, Macrobrachium rosenbergii. Steroids, 107:149-160.
Juvenile hormone epoxide hydrolase	has a role in the regulation of larval metamorphosis and adult reproduction, by regulation of pheromone synthesis and vitellogenesis	Wen R, Wang B, Wang B, Ma L. 201. Characterization and Expression Profiles of Juvenile Hormone Epoxide Hydrolase From Lymantria dispar (Lepidoptera: Lymantridae) and RNA Interference by Ingestion. Journal of Insect Science, 18(1): 13; 1–7.
Lin-9	May play a role in Notch signaling	Goutte C, Hepler W, Mickey KM, Priess JR. 2000. aph-2 encodes a novel extracellular protein required for GLP-1-mediated signaling. Development, 127(11), 2481-2492.
MAB-21	Required for several aspects of embryonic development including normal development of the eye	Mariani M, Baldessari D, Francisconi S, Viggiano L, Rocchi M, Zappavigna V, Malgaretti N, Consalez GG. 1999. Two murine and human homologs of mab-21, a cell fate determination gene involved in Caenorhabditis elegans neural development. Hum Mol Genet. 8(13):2397-406.
Molt-inhibiting hormone	Controls molting by suppressing the synthesis and/or secretion of molting hormone. Acts as an indirect reproduction inhibitor.	Luo X, Chen T, Zhong M, Jiang X, Zhang L, Ren C, Hu C. 2015. Differential regulation of hepatopancreatic vitellogenin (VTG) gene expression by two putative molt-inhibiting hormones (MIH1/2) in Pacific white shrimp (Litopenaeus vannamei). Peptides. 68:58-63.
Mothers Against Decapentaplegic	Transcriptional modulator activated by BMP (bone morphogenetic proteins) type 1 receptor kinase	Zhang Y, Feng X, We R, Derynck R. 1996. Receptor-associated Mad homologues synergize as effectors of the TGF-beta response. Nature. 12;383(6596):168-72.
Neuroparsin	Involved in reproduction and gregarious phasing of the locust	Yang SP, He JG, Sun CB, Chan SF. 2014. Characterization of the shrimp neuroparsin (MeNPLP): RNAi silencing resulted in inhibition of vitellogenesis. FEBS open bio, 4, 976-986.
Notchless protein	May play a role in Notch signaling	Goutte C, Hepler W, Mickey KM, Priess JR. 2000. aph-2 encodes a novel extracellular protein required for GLP-1-mediated signaling. Development, 127(11), 2481-2492.
Numb	May play a role in Notch signaling. Required throughout embryonic neurogenesis to maintain neural progenitor cells.	Goutte C, Hepler W, Mickey KM, Priess JR. 2000. aph-2 encodes a novel extracellular protein required for GLP-1-mediated signaling. Development, 127(11), 2481-2492.
Obstructor-E	Chitin-binding protein that is important for the longitudinal contraction and lateral expansion of the larval cuticle during its conversion into the oval-shaped puparium case.	Uniprot.org
Oocyte zinc finger	Involved in transcriptional regulation.	Knöchel W, Pöting A, Köster M, El Baradi T, Nietfeld W, Bouwmeester T, Pieler T. 1989. Evolutionary conserved modules associated with zinc fingers in Xenopus laevis. Proceedings of the National Academy of Sciences. 86(16):6097-6100.
Pelota	Required for normal chromosome segregation during cell division and genomic stability. Required for normal eye patterning and for mitotic divisions in the ovary.	Xi R, Doan C, Liu D, Xie T. 2005. Pelota controls self-renewal of germline stem cells by repressing a Bam-independent differentiation pathway. Development. 132(24):5365-5374.
Peter Pan	Required for initiation of larval growth and normal mitotic growth	Migeon JC, Garfinkel MS, Edgar BA. 1999. Cloning and characterization of peter pan, a novel Drosophila gene required for larval growth. Molecular biology of the cell. 10(6):1733-1744.
Progesterone-Induced Blocking Factor	Pericentriolar protein required to maintain mitotic spindle pole integrity	Lachmann M, Gelbmann D, Kalman E, POLGar B, Buschle M, Von Gabain A., Szekeres‐Barthó J, Nagy E. 2004. PIBF (progesterone induced blocking factor) is overexpressed in highly proliferating cells and associated with the centrosome. International journal of cancer, 112(1), 51-60.
Purity of essence	Has a role in growth of the perineurial glial layer of the larval peripheral nerve	Yager J, Richards S, Hekmat-Scafe DS, Hurd DD, Sundaresan V, Caprette DR, Saxton WM, Carlson JR, Stern M. 2001. Control of Drosophila perineurial glial growth by interacting neurotransmitter-mediated signaling pathways. Proceedings of the National Academy of Sciences, 98(18):10445-10450.
Protein seele (Sel)	Involved in embryonic dorsal-ventral patterning which is generated by a series of serine protease processing events where gd processes snk which cleaves ea which then processes spz into the activating ligand for the Toll receptor.	Stapleton M, Carlson J, Brokstein P, Yu C, Champe M, George R., Guarin H, Kronmiller B, Pacleb J, Park S, Wan K, Rubin GM, Celniker SE. 2002. A Drosophila full-length cDNA resource. Genome biology, 3(12), research0080-1.
Protein ribosomal 10a	Plays a role in the formation of actively translating ribosomes. May play a role in the embryonic brain development	Uniprot.org
Sel-1	May play a role in Notch signaling	Goutte C, Hepler W, Mickey KM, Priess JR. 2000. aph-2 encodes a novel extracellular protein required for GLP-1-mediated signaling. Development, 127(11), 2481-2492.
Sex determination fruitless	Part of the somatic sex determination hierarchy; sex determination genes transformer	Ventura-López C, Galindo-Torres PE, Arcos FG, Galindo-Sánchez C, Racotta IS, Escobedo-Fregoso C, Ibarra AM. 2017. Transcriptomic information from Pacific white shrimp (Litopenaeus vannamei) ovary and eyestalk, and expression patterns for genes putatively involved in the reproductive process. General and comparative endocrinology, 246, 164-182.
Shuttle craft	Plays an essential role during the late stages of embryonic neurogenesis.	Stroumbakis ND, Li Z, Tolias PP. 1996. A homolog of human transcription factor NF-X1 encoded by the Drosophila shuttle craft gene is required in the embryonic central nervous system. Molecular and cellular biology, 16(1):192-201.
Singles bar	Essential for myoblast fusion in developing embryos and pupae	Uniprot.org
Trithorax	Involved in the very early regulation of homeotic genes expressed only in the posterior region of the embryo	Mazo AM, Huang DH, Mozer BA, Dawid IB. 1990. The trithorax gene, a trans-acting regulator of the bithorax complex in Drosophila, encodes a protein with zinc-binding domains. Proceedings of the National Academy of Sciences, 87(6), 2112-2116.
Twisted gastrulation	May be involved in dorsoventral axis formation	Scott IC, Blitz IL, Pappano WN, Maas SA, Cho KW, Greenspan DS. 2001. Homologues of Twisted gastrulation are extracellular cofactors in antagonism of BMP signalling. Nature, 410(6827):475-478.
Vitellogenesis-inhibiting hormone	The most potent negative regulator of crustacean reproduction; modulates crustacean ovarian maturation by suppressing vitellogenin synthesis.	Chen T, Zhang LP, Wong NK, Zhong M, Ren CH, Hu CQ. 2014. Pacific white shrimp (Litopenaeus vannamei) vitellogenesis-inhibiting hormone (VIH) is predominantly expressed in the brain and negatively regulates hepatopancreatic vitellogenin (VTG) gene expression. Biol Reprod. 90(3):47.

## Sheet: Accession numbers
Sequence name	Genbank accession number or sequence submitted to GenBank
Adam	XM_027351989.1
Agrin	XM_02735 7369.1
Asterix	NW_020869014.1
Bcl-2-related ovarian killer	XM_027354848.1
Blastula protease	XM_027381654.1
Chitinase	AF315689.1
Clathrin heavy chain	KU508425.1
Clathrin light chain	XM_027353571.1
Crustacyanin A1	XR_003477542.1
Crustacyanin C1	BF023907.1
Cyclin B	FJ228728.1
Cytochrome P450	GU969106.2
Diuretic hormone	XM_027368000.1
Estradiol 17 beta deshydrogenase	XM_027378591.1
Estrogen Sulfotransferase	NW_020872193.1
Extra sex comb	QCYY01003476.1
FAMeT	DQ067631.1
Fem-1	KF573432.1
Female Sterile Homeotic	QCYY01001597.1
G2mitoticCB3	GGTO00000000.1
Gastrula zinc finger	XM_027353089.1
Gonadotropin-releasing hormone II receptor	XP_027223404.1
Gustavus	QCYY01001868.1
Homeobox	XM_027351442.1
Hsp70	DQ813343.1
Hydroxysteroid dehydrogenase	NW_020869429.1
Inactive hydroxyesteroid dehydrogenase	QCYY01002026.1
Juvenile hormone epoxide hydrolase	XP_027223682.1
Krueppel	XM_027375117.1
Lin-9	XM_027358486.1
MAB-21	QCYY01000931.1
Mago Nashi	XM_027383611.1
Masquerade	BankIt2345186 MT488322
Maternal effect embryo arrest	BankIt2345186 MT488321
Maternal Embryonic Leucine zipper Kinase	QCYY01002960.1
Maternal tudor	BankIt2345186 MT488320
Meiosis regulator	XM_027381345.1
Membrane progestin receptor	XM_027372485.1
Missing oocyte meiosis (alias MIOS)	NW_020868917.1
Molt-inhibiting hormone	QBS36529.1
Mothers Against Decapentaplegic	XM_027382052.1
Neuroparsin	BE188518.1
Notch	KX245010.1
Notchless protein	XM_027359236.1
Numb	XM_027365302.1
Obstructor-E	NW_020869997.1
Oocyte zinc finger	XM_027351406.1
Ovarian development protein	BankIt2356809 MT636089
Ovaric peritrophin	QCYY01002537.1
Partitioning defective	XM_027353342.1
Pelota	QCYY01002600.1
Peter Pan	NW_020868363.1
Progesterone-Induced Blocking Factor	XM_027357075.1
Progesterone receptor	XM_027359880.1
Protein ribosomal L10a	BF023983.1
Protein seele (Sel)	NW_020872954.1
Purity of essence	QCYY01001817.1
Sel-1	XM_027370027.1
Sex determination protein fruitless	BankIt2345186 MT488319
Sex-lethal homolog	ROT79577.1
Shuttle craft	NW_020870897.1
Singles bar	NW_020871462.1
Slowmo	NW_020870273.1
Strawberry notch	XM_027371222.1
Trithorax	XM_027380491.1
TsunagiY14	GGTO00000000.1
Twisted gastrulation	XM_027356247.1
Vasa	XM_027375221.1
Vitelline envelope receptor of lysin	BankIt2345186 MT488318
Vitelline envelope zona pellucida 14	BankIt2345186 MT488317
Vitelline envelope zona pellucida 29	BankIt2345186 MT488316
Vitelline envelope zona pellucida B	BankIt2345186 MT488315
Vitelline Membrane Outer layer	XM_027351187.1
Vitellogenesis-inhibiting hormone	AGX26044.1
Vtg	MN105878.1
VtgR	XM_027375694.1
